# Supplementary material
Source: MDPI journal article supplement (https://www.mdpi.com/2073-4344/10/4/463)
Supplement: s1 [file s1]

## Supplementary Materials:

# Free radical photopolymerization and 3D printing using newly developed dyes: indane-1,3-dione and 1*H*-cyclopenta naphthalene-1,3-dione derivatives as photoinitiators in three-component systems

Ke Sun<sup>1,2</sup>, Corentin Pigot<sup>3</sup>, Hong Chen<sup>1,2</sup>, Malek Nechab<sup>3</sup>, Didier Gimes<sup>3</sup>, Fabrice Morlet-Savary<sup>1,2</sup>, Bernadette Graff<sup>1,2</sup>, Shaohui Liu<sup>1,2</sup>, Pu Xiao<sup>4\*</sup>, Frédéric Dumur<sup>3\*</sup>, Jacques Lalevée<sup>1,2\*</sup>

<sup>1</sup>Université de Haute-Alsace, CNRS, IS2M UMR 7361, F-68100 Mulhouse, France

<sup>2</sup>Université de Strasbourg, France

<sup>3</sup>Aix Marseille Univ, CNRS, ICR UMR 7273, F-13397 Marseille, France

<sup>4</sup>Research School of Chemistry, Australian National University, Canberra, ACT 2601, Australia.

\*Correspondence: [jacques.lalevee@uha.fr](mailto:jacques.lalevee@uha.fr) (J. L.), [pu.xiao@anu.edu.au](mailto:pu.xiao@anu.edu.au) (P. X.), [frederic.dumur@univ-amu.fr](mailto:frederic.dumur@univ-amu.fr) (F.D.)

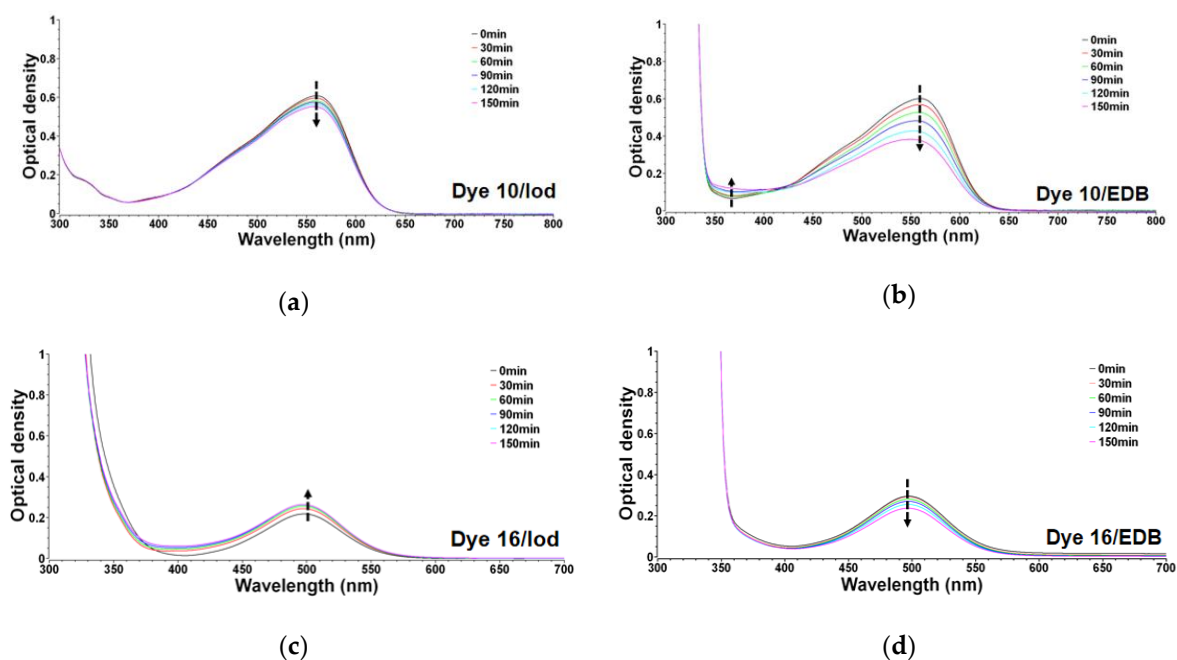

**Figure S1.** UV-vis absorption spectra of dyes 10, 16 ( $9.31 \times 10^{-6} \text{M}$ ;  $6.46 \times 10^{-6} \text{M}$ , respectively.) (left) in the presence of Iodonium salt (Speedcure 938,  $1.46 \times 10^{-4} \text{M}$ ) upon exposure to LED@405nm under air in the solvent of acetonitrile: (a) dye 5, (c) dye 17 and (right) in the presence of amine (Speedcure EDB,  $4.07 \times 10^{-4} \text{M}$ ) upon exposure to LED@405nm under air in the solvent of acetonitrile: (c) dye 5, (d) dye 17.

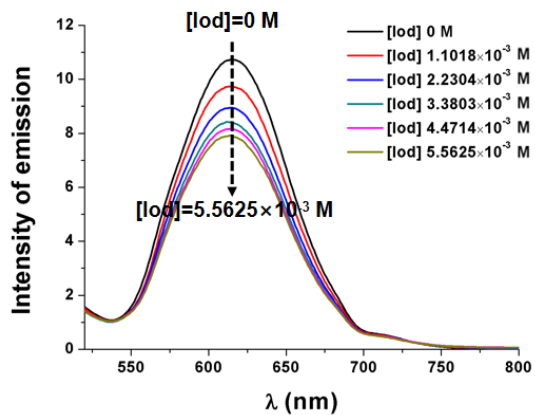

(a)

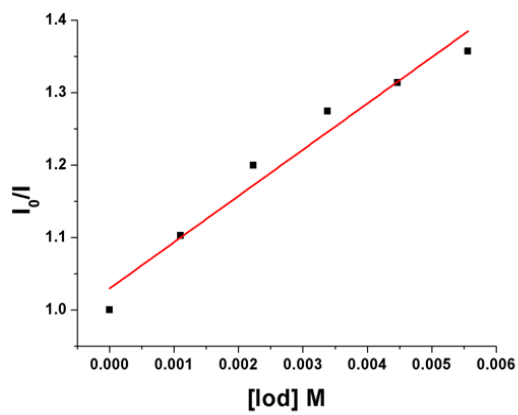

(b)

**Figure S2.** (a) Fluorescence quenching of dye 16 by Iodonium salt; (b) Stern–Volmer treatment for the dye 16/Iodonium salt fluorescence quenching.

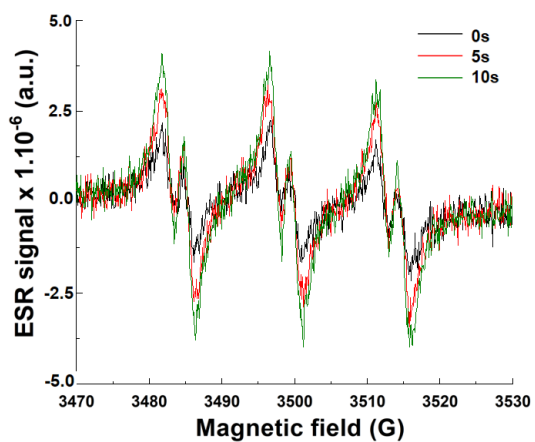

(a)

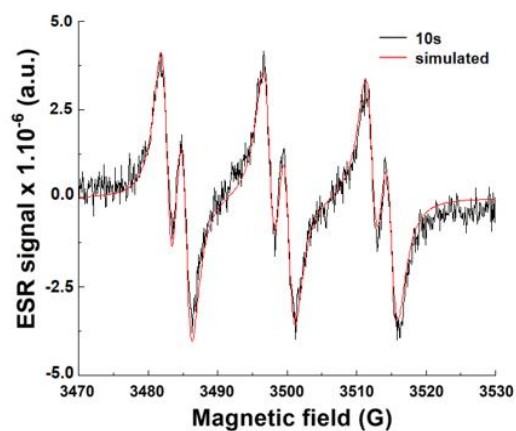

(b)

**Figure S3.** ESR spectra obtained from ESR-spin trapping experiment using PBN = 2 mg/mL (as spin trap agent); Iodonium salt (Speedcure 938) and amine (Speedcure EDB)= 12.6 mg/mL and dye 17= 0.8 mg/mL in acetonitrile under  $N_2$ : **(a)** dye 17/Iod/amine, Irradiation time =10s (green), =5s (red) and =0s (black) spectra; **(b)** dye 17/Iod/amine, Irradiation time =100s (black) and simulated (red) spectra.

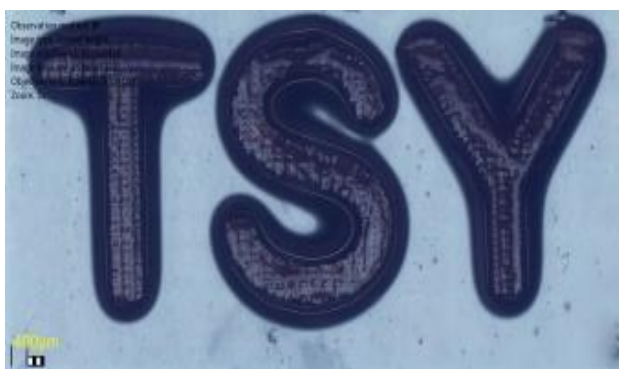

(a)

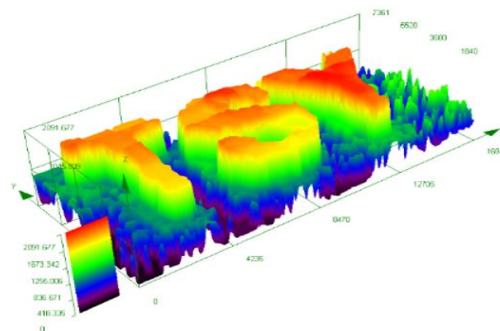

(b)

**Figure S4.** Free radical photopolymerization experiments for laser write experiments for dye 17/Iod/amine (0.1%/2%/2% w/w/w) three-component photoinitiating system in Ebecryl 40. Characterization of the 3D patterns by numerical optical microscopy: **(a)** top surface morphology **(b)** 3-D overall appearance of the 3D patterns.

### $^1\text{H}$ NMR of dye 21

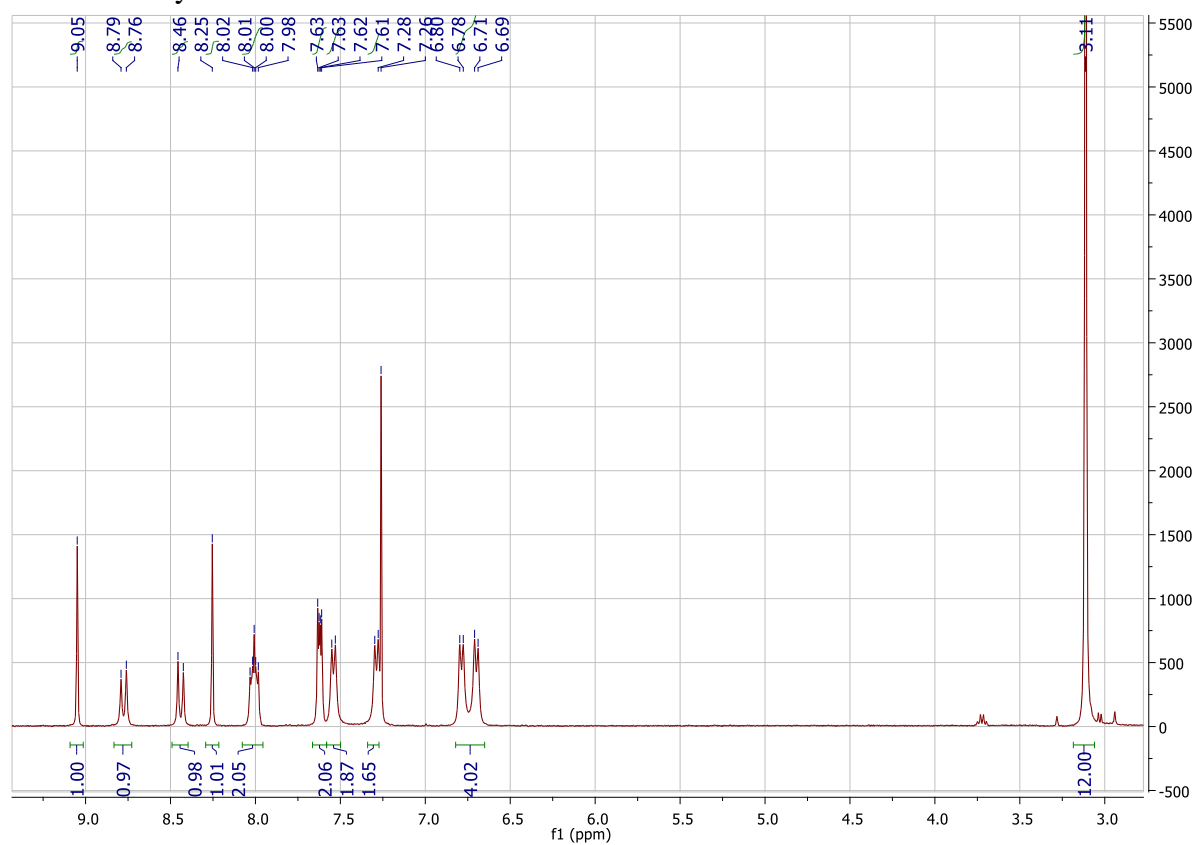

### $^{13}\text{C}$ NMR of dye 21

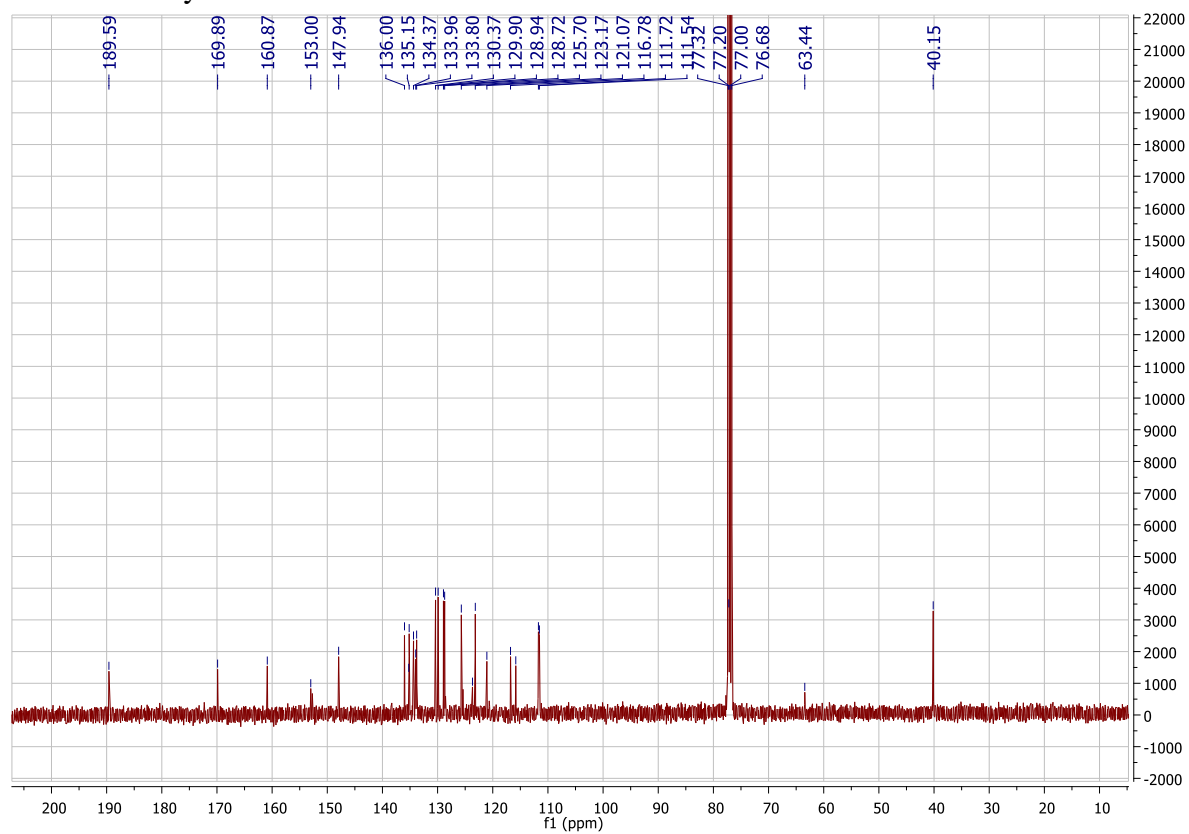

Figure S5.  $^1\text{H}$  and  $^{13}\text{C}$  NMR spectra of dye 21.
